# Supplementary material for: Late Cenozoic sea-surface-temperature evolution of the South Atlantic Ocean
Source: Copernicus journal article supplement (doi:10.5194/cp-19-1931-2023), 2023-10-13
Supplement: Supplementary file 2 [file cp-19-1931-2023-supplement.zip]

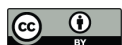

## *Supplement of*

# **Late Cenozoic sea-surface-temperature evolution of the South Atlantic Ocean**

**Frida S. Hoem et al.**

*Correspondence to:* Frida S. Hoem (frida.snh@gmail.com)

- cp-19-1931-2023-supplement-title-page.pdf
- Supplementary Information Hoem et al., 2023.pdf
- Table S3. Site 696 GDGTs.xlsx
- Table S4. Site U1536 GDGTs.xlsx
- \_\_MACOSX
  - .\_Supplementary Information Hoem et al., 2023.pdf
  - .\_Table S3. Site 696 GDGTs.xlsx
  - .\_Table S4. Site U1536 GDGTs.xlsx

The copyright of individual parts of the supplement might differ from the article licence.
